# Supplementary material for: Restoration rocks: integrating abiotic and biotic habitat restoration to conserve threatened species and reduce fire fuel load
Source: Springer Nature journal article supplement (doi:10.1007/s10531-016-1136-4), 2016-05-17

SUPPORTING INFORMATION

**Restoration rocks: integrating abiotic and biotic habitat restoration to conserve threatened species and reduce fire fuel load**

Alice McDougall 1, Richard N. C. Milner 2, Don A. Driscoll 1,3 and Annabel L. Smith 1,*

1 Fenner School of Environment and Society, Frank Fenner Building 141, Australian National University, Linnaeus Way, Canberra ACT 2602, Australia. 2 Parks and Conservation Service, Australian Capital Territory Government, Canberra ACT 2602, Australia. 3 School of Life and Environmental Sciences, Deakin University Geelong, 221 Burwood Highway, Burwood, VIC 3125, Australia

* Author for correspondence: E: annabel@smithecology.org, P: +612 6125 9339, F: +612 6125 0757

**Supplementary materials and methods**

*Themeda provenance*

*Themeda* was sourced from three provenances within New South Wales and the ACT: ‘SP’ (792 plants; –35.458957, 149.176373; grown Feb-May 2014), ‘GA’ (528 plants; –35.289751, 149.039799; grown Jan-May 2014) and ‘P’ (168 plants; –36.231049, 149.132027; –35.709790, 150.176809; –36.676642, 149.842977; grown Feb-May 2014). From the south end of each plot, we planted five rows of SP stock, one row of P stock and three row of GA stock.

*Soil chemistry analysis*

*pH and electrical conductivity*: A 1:5 soil:water suspension was made by placing 8 g of soil into a 50 ml centrifuge tube with 40 ml of deionised water. Tubes were placed in a rotary shaker for an hour, removed and allowed to settle for 30 minutes. pH and electrical conductivity were read from a calibrated Orion Pacific 5 Star meter using a 013010MD Orion Duraprobe with 4 electrode conductivity cells (for electrical conductivity) and a 9107WMMD Orion triode waterproof probe (for pH).

*Nitrate and ammonium*: 2.5 g of soil was placed into a 5ml centrifuge tube with 25 ml of 2M potassium chloride. Samples were centrifuged, filtered and placed into 15 ml tubes and loaded into a Lachat ﬂow injection analysis system. The nitrate and ammonium concentrations were determined by converting mgL-1 into mgkg-1.

*Phosphorus*: 1g of soil was placed into a 50ml centrifuge with 40 ml of 0.5M NaHCO3. Samples centrifuged, filtered and extracts in 15ml tubes were loaded into a Lachat QuikChem ﬂow injection analysis system. The phosphorus concentration was determined by converting mgL-1 into mgkg-1.

*Total N and total C*: we used dry combustion elemental analysis on 2 g of soil in an Elementar VarioMax CNS system. The samples were burned in excess oxygen, and combustion products (carbon dioxide, water and nitric oxide) were collected. The mass of the combustion products was used to calculate the unknown composition of the sample.

*Bulk density*: Soils were weighed and recorded in the metal core, then oven-heated at 105° C for 12 hr. Following cooling, samples were re-weighed then removed from the metal core. Bulk density was calculated by dividing the dried soil weight by the soil volume (i.e. the volume of the metal core).

**Figure S1.** Schematic diagram of plot and treatment layout. Each replicate also included a reference site in nearby high-quality native grassland (not shown here; see Fig. 1 in main document). (a) Rocks and tubestock grasses (*Themeda* *triandra* and *Poa* *sieberiana*) were applied across the whole plot, including the 1 m buffer, on all plots except the control. (b) Treatments were randomly assigned within the site and arranged so that each plot shared a boundary with at least one other plot.


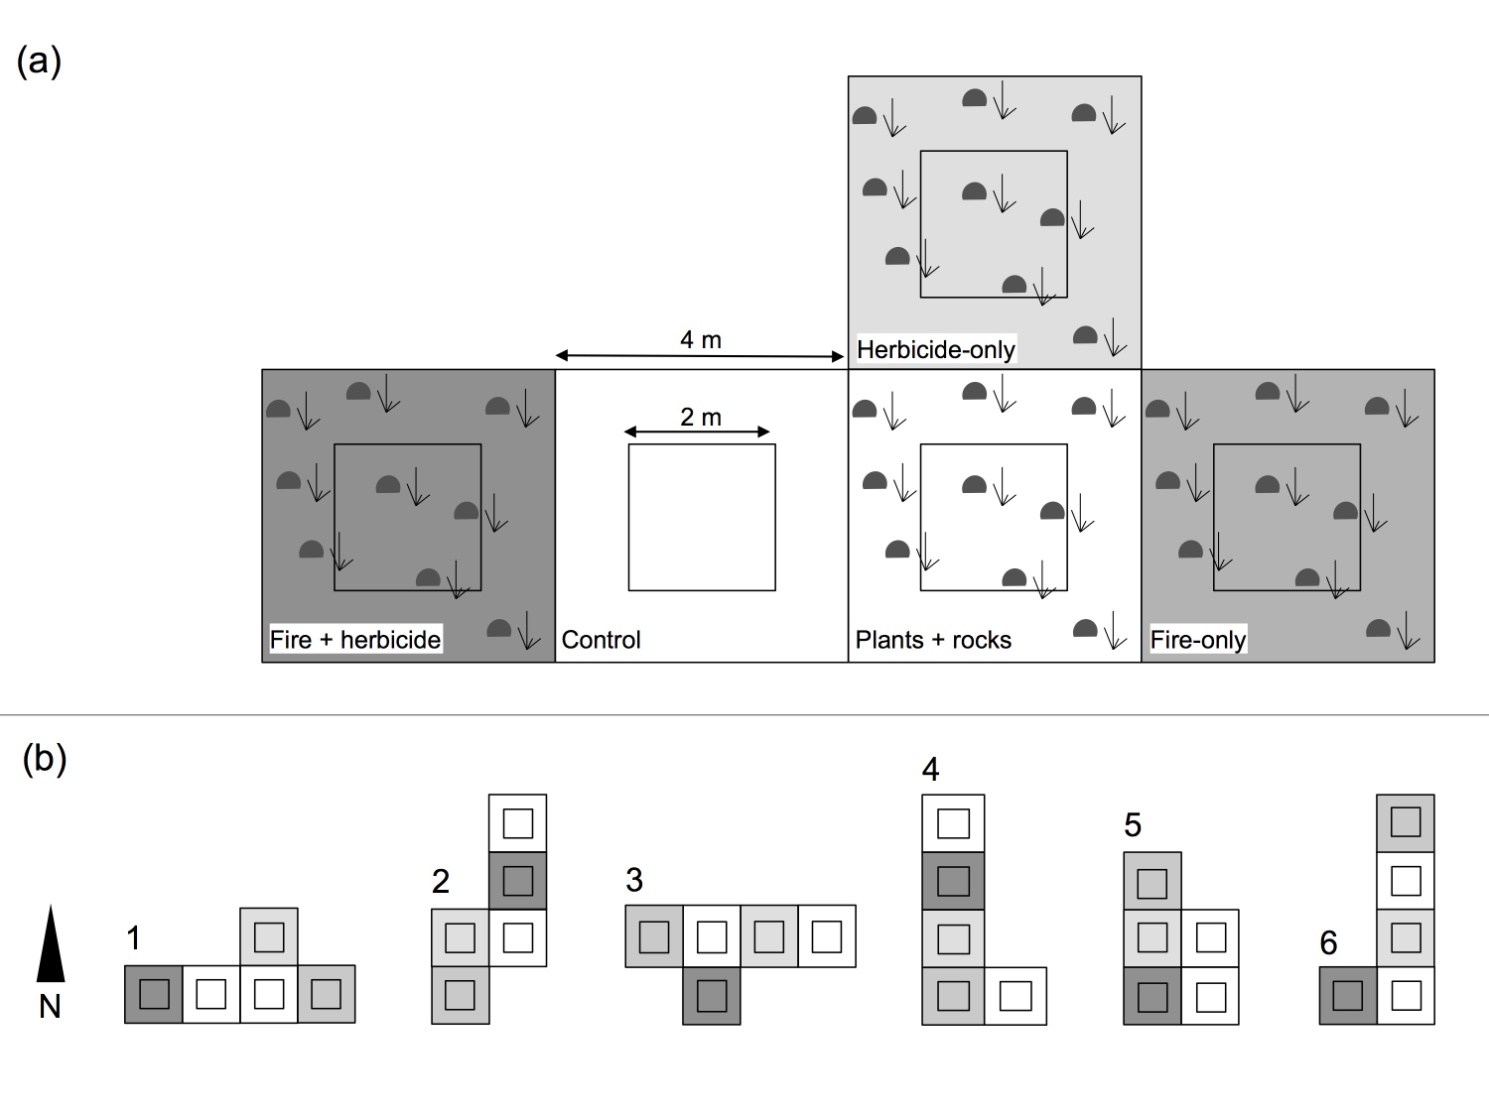


**Figure S2.** Nonmetric multi-dimensional scaling (NMDS) plots showing the effect of treatment and time on plant community composition (a) with (stress = 0.20) and (b) without (stress = 0.23) non-vegetative material (rocks, leaf litter and bare ground). Although plant community composition became more similar to the reference plots along axis 1, a high degree of similarity among treatments at the end of the experiment suggested limited treatment effects on plant community composition. Open circles = pre-treatment, closed circles = post-treatment, R = reference, C = control, PR = plants + rocks, F = fire-only, H = herbicide-only, FH = fire + herbicide.


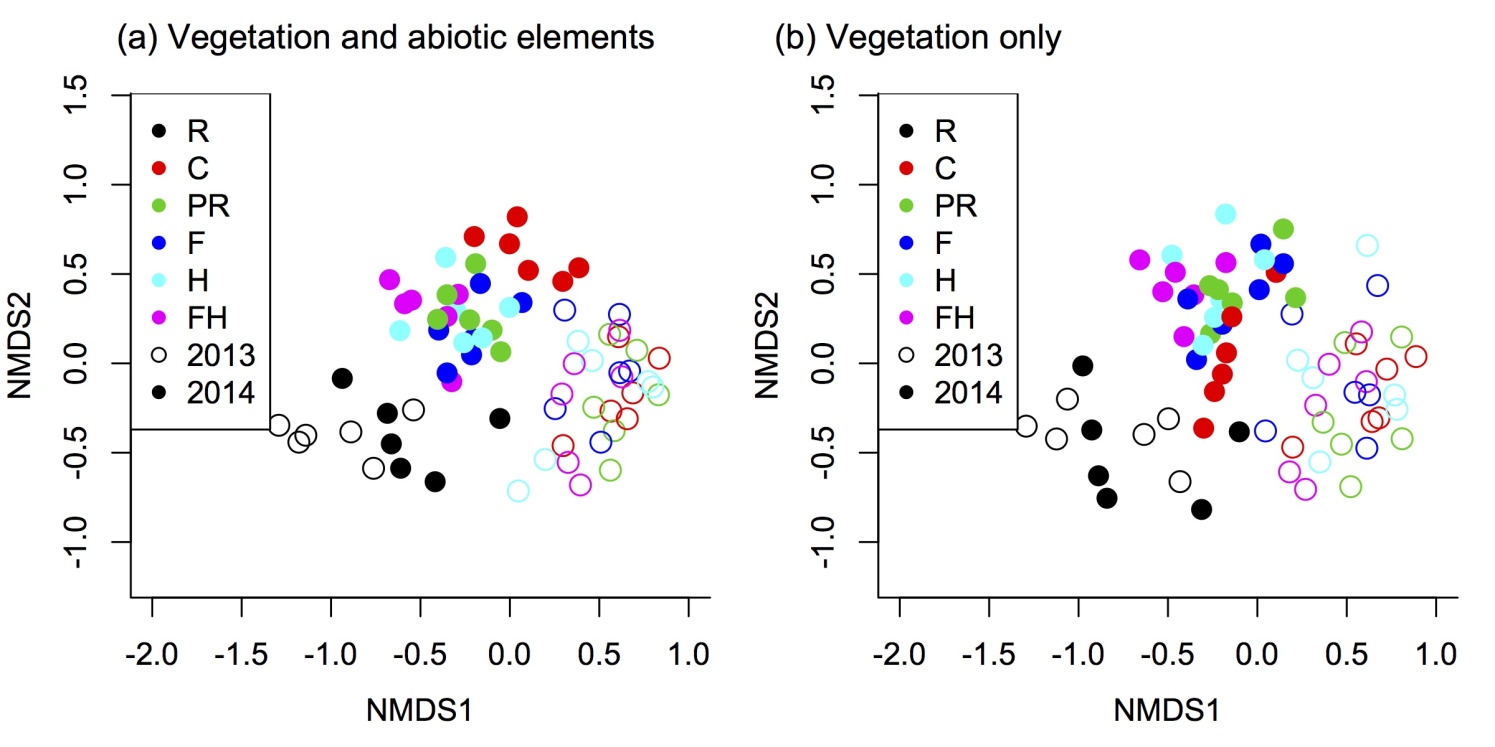


**Figure S3.** Estimated effect (and 95 % confidence interval) of restoration treatment on the percentage cover of native and exotic plant groups. Treatment H had lower cover of exotic perennials than the control (LSD [95 % confidence interval] = –2.56 [–4.99, –0.13]) but this was consistent across years and thus not attributable to the treatment. Open circles = pre-treatment, closed circles = post-treatment, R = reference, C = control, PR = plants and rocks, F = fire, H = herbicide, FH = fire and herbicide.


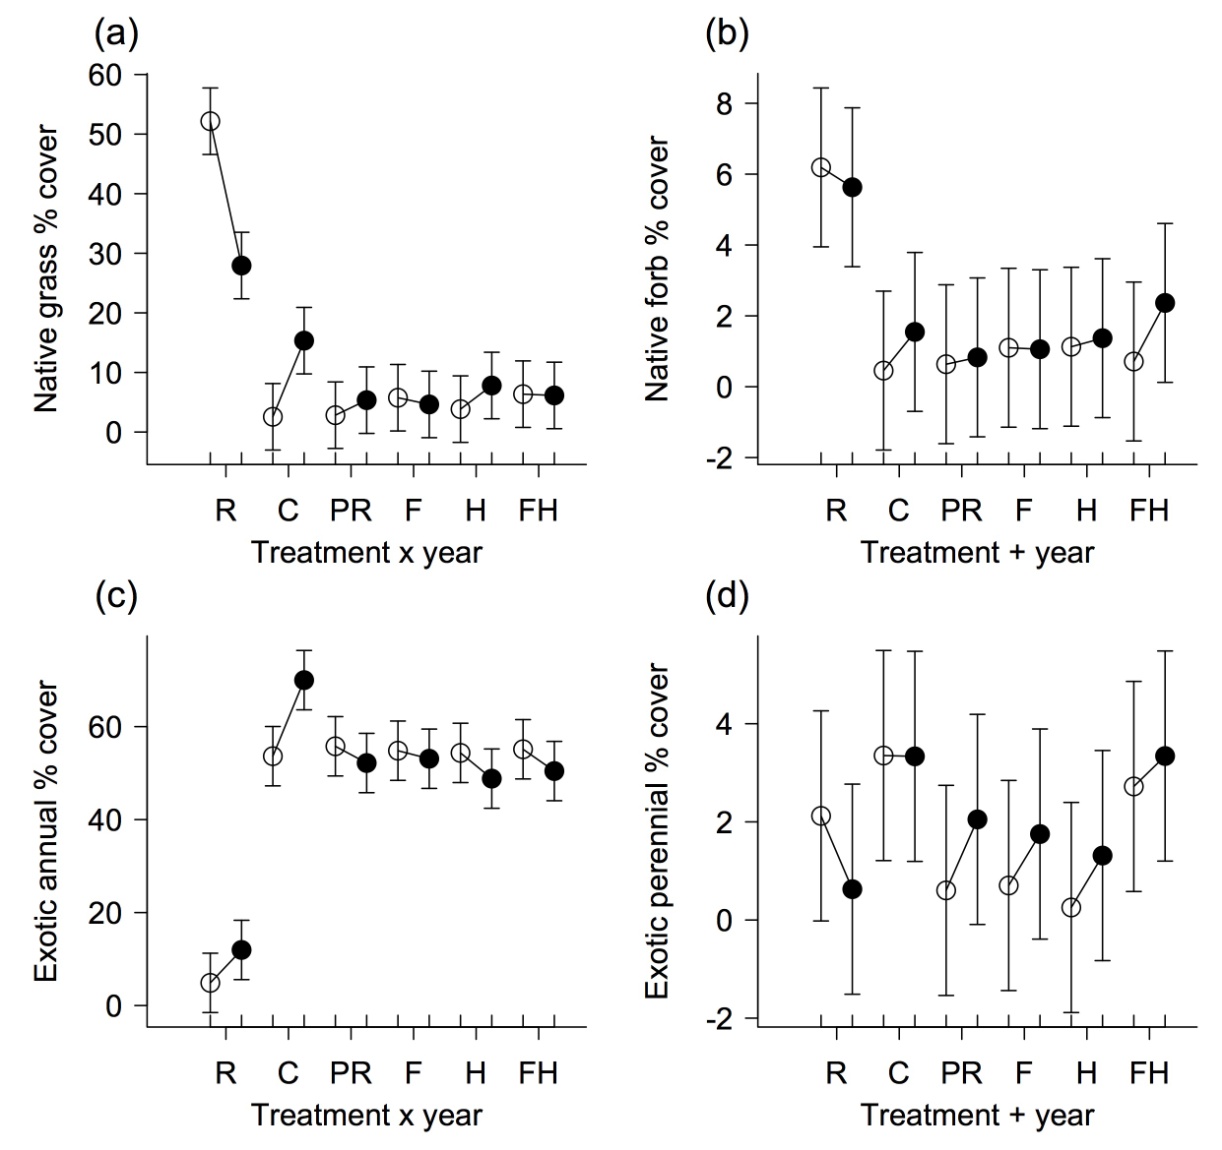


**Figure S4.** Estimated effect (and 95 % confidence interval) of restoration treatment on the percentage cover of individual species (these are not dominant species that contribute strongly to fire fuel loads). Treatment FH significantly increased the cover of (a) *Conyza sp.*, (b) *Linaria pelisseriana*, (c) *Petrorhagia nanteuilii* and (d) *Vulpia sp.*, while treatment H increased the cover of (a) *Conyza sp.* and (d) *Vulpia sp.* Open circles = pre-treatment, closed circles = post-treatment, R = reference, C = control, PR = plants and rocks, F = fire, H = herbicide, FH = fire and herbicide.


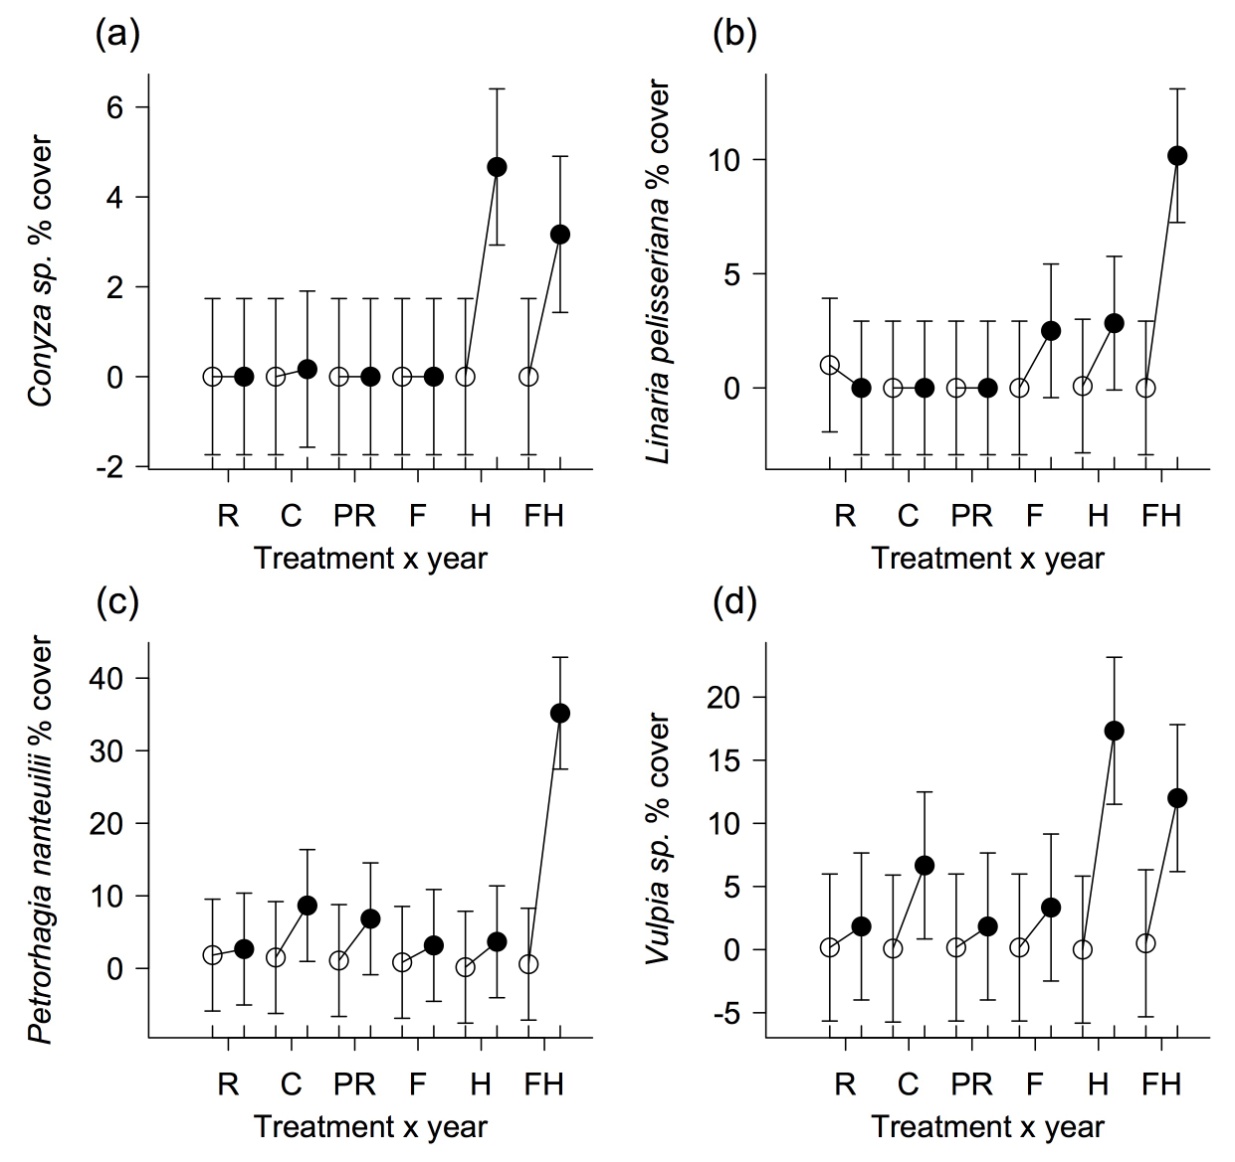


**Figure S5.** Estimated effect (and 95 % confidence interval) of provenance on *Themeda* (a) height, (b) diameter and (c) survival rate. The model also included an interaction between time and restoration treatment (see Fig. 3 in main document). (a) GA and P had greater height growth than SP (*P* < 0.001). (b) Diameter growth was greater in GA than P while SP was lowest overall (*P* < 0.001). (c) GA had greater survival rates than P and SP (*P* < 0.001). Values are shown for the end of the experiment (time 2) and for the fire + herbicide treatment. Shared letters indicate no difference.


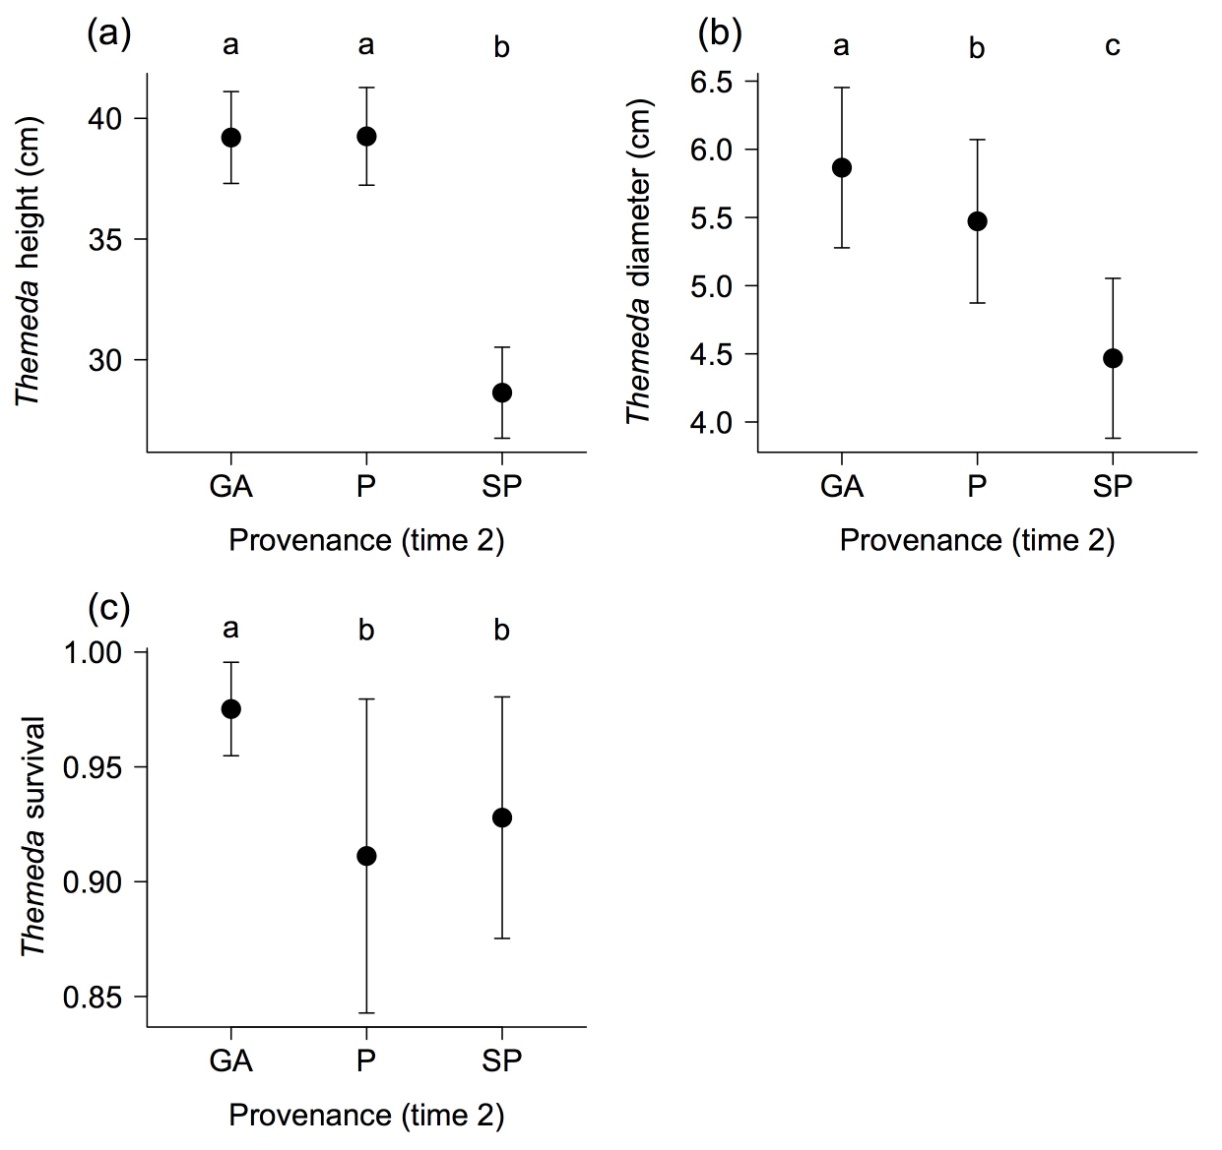

Supplement: MOESM1 [file 10130298]
